# Supplementary material for: Assessment of an electronic patient record system on discharge prescribing errors in a Tertiary University Hospital
Source: PubMed Central journal article supplement (PMC8218465; doi:10.1186/s12911-021-01551-5), 2021-06-21
Supplement: 12911_2021_1551_MOESM1_ESM.pdf [file 12911_2021_1551_MOESM1_ESM.pdf]

**Assessment of an Electronic Patient Record System on Discharge Prescribing Errors in a Tertiary**

**University Hospital**

Additional Material: Survey on Discharge Prescribing for Interns in SJH

**Authors:**

Michael O'Shea<sup>1,2,3</sup>, Cormac Kennedy<sup>1,3</sup>, Eileen Relihan<sup>1</sup>, Kieran Harkin<sup>4</sup>, Martina Hennessy<sup>1,3</sup> and Michael Barry<sup>1,3</sup>

1 – Saint James's Hospital, Dublin, Ireland; 2- Dublin Southeast Network Academic Track Internship, Dublin, Ireland; 3 – Trinity College Dublin, Ireland; 4 – Inchicore Family Doctors, Dublin, Ireland

**Corresponding author:** Michael O'Shea

Email: osheam12@tcd.ie

Tel: +1 602 348 3534

Address: 55 O'Reilly Avenue, Ceannt Fort, Kilmainham, Dublin 8, D08PR2A, Ireland.

File name: Survey on Discharge Prescribing for Interns in SJH

File Format: PDF

Title of Data: Survey of Interns on Discharge Prescribing in SJH

Description of Data: This document contains a survey of first year junior doctors (interns), which was conducted on the 9<sup>th</sup> of January 2018. This survey was first piloted for acceptability and ease of use on final year medical students.

## **Survey on Discharge Prescribing for Interns in SJH**

*This is a survey which is a component of a quality improvement audit in Saint James's Hospital. By completing this survey, you consent to have your answers included to this project, and any subsequent publications or presentations that may result from the project. Please do not include any information which could identify you or anyone else.*

How long have you been an intern? \_\_\_\_ months and \_\_\_\_ weeks

How long have you been an intern at SJH? \_\_\_\_ months and \_\_\_\_ weeks

What medical school did you attend? \_\_\_\_\_

What type of medical program (eg postgraduate, undergraduate) did you complete? \_\_\_\_\_

### **Prescribing at Discharge**

*Please answer the following questions in relation to your experiences completing discharge prescriptions and discharge summaries for inpatients in SJH.*

| <b>Please indicate to what extent you agree/disagree with the following statements</b>                                                                                       | <b>Strongly disagree</b> | <b>Disagree</b>  | <b>Unsure</b>    | <b>Agree</b> | <b>Strongly Agree</b> |
|------------------------------------------------------------------------------------------------------------------------------------------------------------------------------|--------------------------|------------------|------------------|--------------|-----------------------|
| I am satisfied with my ability to complete discharge summaries and prescriptions in SJH                                                                                      |                          |                  |                  |              |                       |
| If an intern is familiar with a patient they are less likely to make errors in the patient's discharge prescription                                                          |                          |                  |                  |              |                       |
| It is important to indicate which medications are discontinued on discharge prescription                                                                                     |                          |                  |                  |              |                       |
| I have received adequate training on discharge prescribing                                                                                                                   |                          |                  |                  |              |                       |
| If I am unfamiliar with a patient, I can discuss their care with someone who is more familiar with the patient                                                               |                          |                  |                  |              |                       |
| I would like further teaching in pharmacology and practical prescribing as part of my internship year                                                                        |                          |                  |                  |              |                       |
| A prescribing safety exam at the end of intern year would improve patient care                                                                                               |                          |                  |                  |              |                       |
| I am comfortable with prescribing for patients whose care I have not been involved with                                                                                      |                          |                  |                  |              |                       |
| <b>How often do you think the following occurs?</b>                                                                                                                          | <b>Never</b>             | <b>Not often</b> | <b>Sometimes</b> | <b>Often</b> | <b>Always</b>         |
| If there has been a change in a patient's medication, I attempt to find the reason for this change in their records before completing the discharge prescription and summary |                          |                  |                  |              |                       |
| If I have a question about a patient's medication on discharge, I can talk to someone more senior about the issue                                                            |                          |                  |                  |              |                       |
| If I am unfamiliar with a patient, I can discuss their care with someone who is more familiar with the patient                                                               |                          |                  |                  |              |                       |
| I am familiar with patients I complete discharges on                                                                                                                         |                          |                  |                  |              |                       |

### **Factors which contribute to discharge prescriptions**

Please indicate how often you refer to each of the following items when writing a discharge prescription.

|                                            | <b>Never</b> | <b>Rarely</b> | <b>Sometimes</b> | <b>Often</b> | <b>Always</b> |
|--------------------------------------------|--------------|---------------|------------------|--------------|---------------|
| Patient Kardex                             |              |               |                  |              |               |
| Clinical notes                             |              |               |                  |              |               |
| Pre-admission medicine reconciliation list |              |               |                  |              |               |
| Input from consultants/senior colleagues   |              |               |                  |              |               |

| How frequently do you think you make the following errors when writing discharge prescriptions?     | > Once a day | Once a day | > Once a week | Once a week | > Once a month | Once a month | Never |
|-----------------------------------------------------------------------------------------------------|--------------|------------|---------------|-------------|----------------|--------------|-------|
| Omission of a medication                                                                            |              |            |               |             |                |              |       |
| Error relating to dose, frequency or formulation                                                    |              |            |               |             |                |              |       |
| Prescription at discharge of a medication which was intentionally discontinued during hospital stay |              |            |               |             |                |              |       |
| Communication error                                                                                 |              |            |               |             |                |              |       |

**For each of the errors mentioned above, please indicate why you think they occur in discharge prescribing?**

1. Omission of medication:

2. Error relating to frequency, dose or formulary:

3. Communication error:

4. Prescription of a medication that was intentionally stopped during inpatient stay:

Are there any other types of errors which you think are common on discharge?

**Yes No**

If yes, please elaborate:

**Possible changes to prescribing**

Please indicate which changes you think will be successful in reducing medication errors, by grading each of the options on a scale of 1-5, where 1 is no reduction and 5 is substantial reduction.

| Change                                                                                                                                             | 1 | 2 | 3 | 4 | 5 |
|----------------------------------------------------------------------------------------------------------------------------------------------------|---|---|---|---|---|
| Further education of Non-Consultant Hospital Doctors                                                                                               |   |   |   |   |   |
| Pharmacist performing medicine reconciliation at discharge                                                                                         |   |   |   |   |   |
| Introduction of electronic prescribing                                                                                                             |   |   |   |   |   |
| Provision of a patient-held 'current medicines list card' to all patients, which is updated at discharge                                           |   |   |   |   |   |
| Provision of a patient-held memory key or account on a secure server containing a medication list which is updated at discharge                    |   |   |   |   |   |
| Discharge prescriptions indicate if they are supplemental primary care prescription, or if they are to replace previous primary care prescriptions |   |   |   |   |   |
| Including prescriber contact details (eg a healthmail address) in discharge prescriptions or discharge summary                                     |   |   |   |   |   |

Please indicate if there are any changes you think would reduce prescribing error at discharge, which are not included the list above. Please elaborate on these changes:

Are there any other aspects of discharge prescribing which you think warrant further investigation?

Do you think it would be helpful to have a shared primary care/secondary care regional formulary for common medicines?

**Yes No**

If yes, please elaborate:
